# Supplementary material
Source: PubMed Central journal article supplement (PMC5065019)
Supplement: NIHMS817783-supplement-25667957.pdf [file NIHMS817783-supplement-25667957.pdf]

# UV Resonance Raman Investigation of the Aqueous Solvation Dependence of Primary Amide Vibrations

## Supporting Information

David Punihaole<sup>†</sup>, Ryan S. Jakubek<sup>†</sup>, Elizabeth M. Dahlburg<sup>†</sup>,  
Zhenmin Hong<sup>†</sup>, Nataliya S. Myshakina<sup>‡</sup>, Steven Geib<sup>†</sup>,  
and Sanford A. Asher<sup>\*,†</sup>

<sup>†</sup>University of Pittsburgh, Pittsburgh, Pennsylvania 15260

Department of Chemistry

<sup>‡</sup>Chatham University, Pittsburgh, Pennsylvania 15232

Science Department

\*Email: [asher@pitt.edu](mailto:asher@pitt.edu)

## X-ray Crystal Structure of Propanamide

X-ray crystal diffraction was performed using a Bruker X8 Prospector Ultra equipped with a copper micro-focus tube ( $\lambda = 1.54178 \text{ \AA}$ ). A propanamide crystal specimen with approximate dimensions of 0.020 mm x 0.090 mm x 0.110 mm was used for structure determination. The crystal was mounted and placed in a cold  $\text{N}_2$  stream ( $\sim 230 \text{ K}$ ) for data collection. Crystals were not well-formed, showing diffuse diffraction spots; however, we were able to determine a unit cell and solve a crystal structure.

The frames were integrated with the Bruker SAINT software package. The integration of the data using a monoclinic unit cell yielded a total of 2212 reflections to a maximum  $\theta$  angle of  $68.09^\circ$  ( $0.83 \text{ \AA}$  resolution), of which 689 were independent (average redundancy 3.210, completeness = 83.5%,  $R_{int} = 8.52\%$ ,  $R_{sig} = 7.03\%$ ) and 364 (52.83%) were greater than  $2\sigma(F^2)$ .

The final cell constants (Table S1) of  $a = 8.851(4) \text{ \AA}$ ,  $b = 5.750(2) \text{ \AA}$ ,  $c = 9.766(3) \text{ \AA}$ ,  $\beta = 114.780(15)^\circ$ , volume =  $451.3(3) \text{ \AA}^3$ , are based upon the refinement of the XYZ-centroids of reflections above  $20 \sigma(I)$ . Unit-cell parameters and analysis of systematic absences indicated propanamide crystallized in a  $\text{P2}_1/c$  space group.

The structure (Figure S1) was solved via direct methods, which located all of the non-hydrogen atoms. Idealized atom positions were calculated for all hydrogen atoms, except for  $\text{NH}_2$  hydrogen atoms (see Tables S2-S6). The final anisotropic least-squares refinement on  $F^2$  converged at  $R1 = 9.53\%$ , for the observed data and  $wR2 = 24.72\%$  for all data, and the goodness-of-fit was 1.304. The final Fourier map contained no significant residual electron density.

## Deconvolution of UVRR Spectra

UVRR spectra of propanamide in different acetonitrile and water mixtures were deconvoluted into a sum of a minimum number of Gaussian or Lorentzian bands on a linear background using the GRAMS/AI 8.0 software suite (Thermo Fisher). Figures S2 and S3 show the deconvolution of the 204 nm excitation UVRR spectra of propanamide in pure acetonitrile and pure water.

Table S 1: Summary of Crystallographic Data for CH<sub>3</sub>CH<sub>2</sub>CONH<sub>2</sub>

|                                     |                                  |
|-------------------------------------|----------------------------------|
| Molecular formula                   | C <sub>3</sub> H <sub>7</sub> NO |
| Temperature (K)                     | 230(2)                           |
| Wavelength (Å)                      | 1.54178                          |
| Theta range (°)                     | 9.18-68.09                       |
| Cell setting                        | monoclinic                       |
| Space group                         | P2 <sub>1</sub> /c               |
| a (Å)                               | 8.851(4)                         |
| b (Å)                               | 5.750(2)                         |
| c (Å)                               | 9.766(3)                         |
| $\alpha$ (°)                        | 90                               |
| $\beta$ (°)                         | 114.780(15)                      |
| $\gamma$ (°)                        | 90                               |
| V (Å <sup>3</sup> )                 | 451.259                          |
| Z                                   | 4                                |
| Calc. density (g·cm <sup>-3</sup> ) | 1.076                            |
| R1                                  | 0.0953                           |
| wR2                                 | 0.2472                           |

Table S 2: Atomic Coordinates and Equivalent Isotropic Atomic Displacement Parameters ( $\text{\AA}^2$ )

|     | x/a       | y/b        | z/c       | U(eq)      |
|-----|-----------|------------|-----------|------------|
| O9  | 0.6355(5) | 0.7687(5)  | 0.6186(3) | 0.1029(15) |
| N10 | 0.6057(7) | 0.8705(7)  | 0.3890(4) | 0.0958(16) |
| C1  | 0.8330(8) | 0.3790(10) | 0.6341(7) | 0.120(2)   |
| C2  | 0.7834(9) | 0.5471(11) | 0.5093(6) | 0.121(2)   |
| C6  | 0.6678(7) | 0.7373(7)  | 0.5094(5) | 0.0867(16) |

Table S 3: Anisotropic Atomic Displacement Parameters ( $\text{\AA}^2$ )

|     | $U_{11}$ | $U_{22}$ | $U_{33}$   | $U_{23}$   | $U_{13}$ | $U_{12}$   |
|-----|----------|----------|------------|------------|----------|------------|
| O9  | 0.166(3) | 0.095(2) | 0.0723(19) | 0.0141(14) | 0.075(2) | 0.0239(18) |
| N10 | 0.159(4) | 0.084(3) | 0.067(2)   | 0.004(2)   | 0.069(3) | 0.014(3)   |
| C1  | 0.152(6) | 0.092(3) | 0.116(4)   | 0.007(3)   | 0.055(4) | 0.018(3)   |
| C2  | 0.169(6) | 0.121(4) | 0.098(4)   | 0.022(3)   | 0.080(4) | 0.047(4)   |
| C6  | 0.135(4) | 0.072(3) | 0.070(2)   | 0.002(2)   | 0.060(3) | 0.004(2)   |

Table S 4: Comparison of Bond Lengths ( $\text{\AA}$ ) Between the DFT-optimized and X-ray Crystal Structure

|            | Crys. Struc. | DFT Calc. |
|------------|--------------|-----------|
| r(C6=O9)   | 1.228(6)     | 1.223     |
| r(C6-N10)  | 1.315(5)     | 1.353     |
| r(C6-C2)   | 1.498(8)     | 1.519     |
| r(C2-C1)   | 1.470(8)     | 1.521     |
| r(C1-H3)   | 0.97         | 1.090     |
| r(C1-H4)   | 0.97         | 1.091     |
| r(C1-H5)   | 0.97         | 1.091     |
| r(C2-H7)   | 0.98         | 1.095     |
| r(C2-H8)   | 0.98         | 1.093     |
| r(N10-H11) | 0.83(5)      | 1.007     |
| r(N10-H12) | 0.97(6)      | 1.008     |

Table S 5: Comparison of Torsion Angles ( $^{\circ}$ ) Between the DFT-optimized and X-ray Crystal Structure

|                     | Crys. Struc. | DFT Calc. |
|---------------------|--------------|-----------|
| $\tau$ (N10C6C2C1)  | -171.5(5)    | 169.60    |
| $\tau$ (O9C6C2C1)   | 9.8(7)       | -10.89    |
| $\tau$ (H12N10C6O9) | -16(4)       | -2.69     |
| $\tau$ (H12N10C6C2) | 166(4)       | 176.83    |
| $\tau$ (H11N10C6O9) | -176(3)      | -178.79   |
| $\tau$ (H11N10C6C2) | 5(3)         | 0.72      |
| $\tau$ (H5C1C2H8)   | -56.4        | -58.32    |
| $\tau$ (H5C1C2H7)   | 59.5         | 59.54     |
| $\tau$ (H5C1C2C6)   | -178.4       | 179.58    |
| $\tau$ (H3C1C2H8)   | -176.4       | -178.37   |
| $\tau$ (H3C1C2H7)   | -60.4        | -60.51    |
| $\tau$ (H3C1C2C6)   | 61.6         | 59.54     |
| $\tau$ (H4C1C2H8)   | 63.6         | 61.64     |
| $\tau$ (H4C1C2H7)   | 179.6        | 179.50    |
| $\tau$ (H4C1C2C6)   | -58.4        | -60.46    |
| $\tau$ (H8C2C6O9)   | -112.2       | -134.50   |
| $\tau$ (H8C2C6N10)  | 66.5         | -45.99    |

Table S 6: Comparison of Bond Angles ( $^{\circ}$ ) Between the DFT-optimized and X-ray Crystal Structure

|                            | Crys. Struc. | DFT Calc. |
|----------------------------|--------------|-----------|
| $\theta(\text{H12N10H11})$ | 121(4)       | 118.56    |
| $\theta(\text{H12N10C6})$  | 118(3)       | 119.60    |
| $\theta(\text{H11N10C6})$  | 118(3)       | 121.73    |
| $\theta(\text{H5C1H3})$    | 109.4        | 108.43    |
| $\theta(\text{H5C1H4})$    | 109.5        | 108.32    |
| $\theta(\text{H5C1C2})$    | 109.5        | 110.17    |
| $\theta(\text{H3C1H4})$    | 109.5        | 107.97    |
| $\theta(\text{H3C1C2})$    | 109.5        | 110.90    |
| $\theta(\text{H4C1C2})$    | 109.5        | 110.17    |
| $\theta(\text{C1C2H8})$    | 108.2        | 111.15    |
| $\theta(\text{C1C2H7})$    | 108.2        | 110.72    |
| $\theta(\text{C1C2C6})$    | 116.5(5)     | 112.88    |
| $\theta(\text{H8C2H7})$    | 107.3        | 106.26    |
| $\theta(\text{H8C2C6})$    | 108.2        | 108.44    |
| $\theta(\text{H7C2C6})$    | 108.2        | 107.09    |
| $\theta(\text{O9C6N10})$   | 121.9(4)     | 122.07    |
| $\theta(\text{O9C6C2})$    | 121.1(4)     | 122.91    |
| $\theta(\text{N10C6C2})$   | 117.0(4)     | 115.02    |



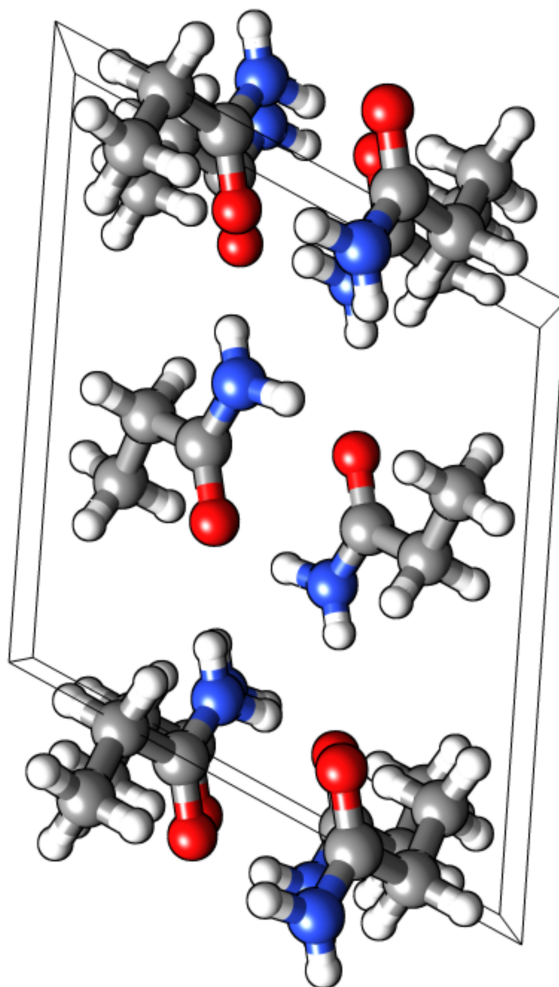

Figure S 1: Crystal structure of propanamide.

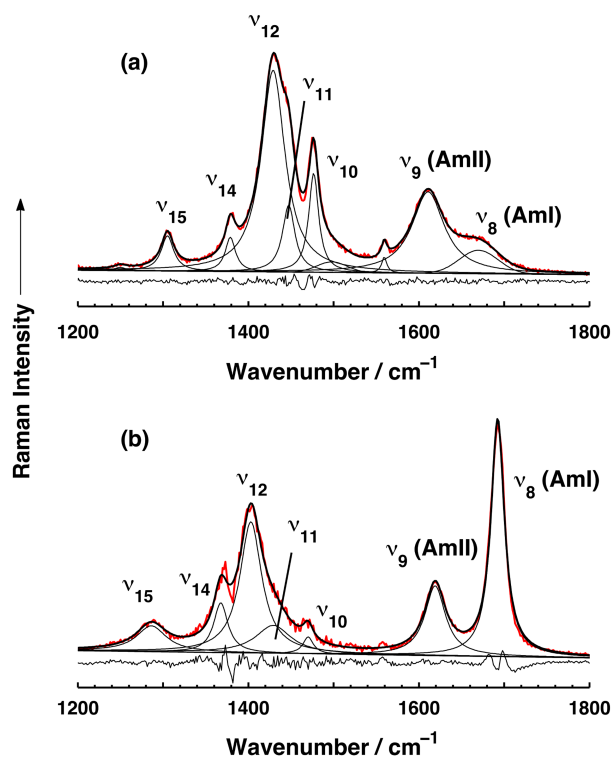

Figure S 2: Spectral deconvolution of the 204 nm UVRR spectrum of propanamide in (a) water and (b) acetonitrile in the region from 1200-1800 cm<sup>-1</sup>.

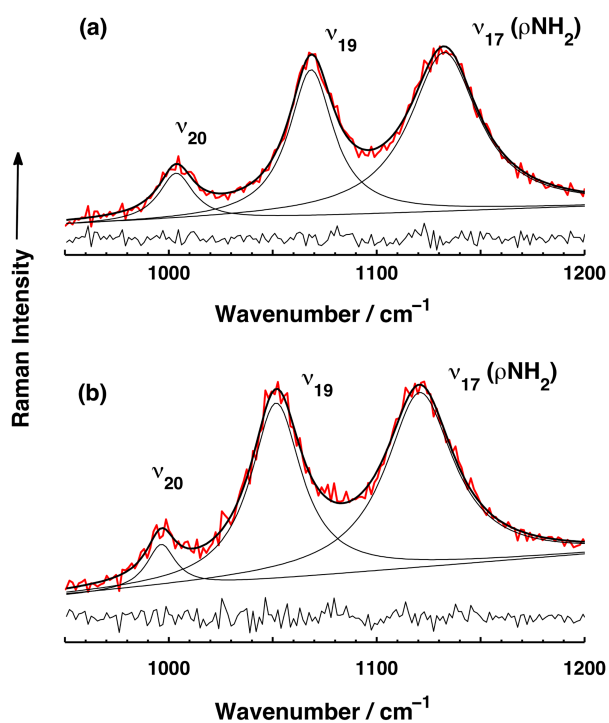

Figure S 3: Spectral deconvolution of the 204 nm UVRR spectrum of propanamide in (a) water and (b) acetonitrile in the region from 800-1200 cm<sup>-1</sup>.
